# Supplementary material for: Solving Nonlinear and Complex Optimal Control Problems via Multi-task Artificial Neural Networks
Source: Research Square preprint supplement (doi:10.21203/rs.3.rs-6134840/v1), 2025-05-09
Supplement: Supplementary file 1 [file 65ad5dbbfa657da8b893415d.pdf]

# Supplementary Information

## Solving Nonlinear and Complex Optimal Control Problems via Multi-task Artificial Neural Networks

Ali Emami Kerdabadi<sup>1</sup>

Alaeddin Malek<sup>1\*</sup>

<sup>1</sup>Department of Applied Mathematics, Faculty of Mathematical Sciences, Tarbiat Modares University, Tehran, 14115-134, Iran  
Email: mala@modares.ac.ir

### Preliminaries

**Definition 1.** A convex polyhedron  $P \in \mathbb{R}^n$  is defined by a finite set of linear inequalities

$$P = \{x \in \mathbb{R}^n | Ax \leq b\}, \quad (1)$$

where  $A \in \mathbb{R}^{m \times n}$  and  $b \in \mathbb{R}^n$ .

**Definition 2.** Let  $S \subset \mathbb{R}^n$  be a compact set and  $x \in \mathbb{R}^n$ . The tangent cone of  $S$  at  $x$  denoted by  $\mathcal{T}_S(x)$  and given as follow

$$\mathcal{T}_S(x) = \{y \in \mathbb{R}^n | \liminf_{h \rightarrow 0} \frac{\text{dist}(x + hy, S)}{h} = 0\}$$

where  $\text{dist}(x, S) = \inf_{s \in S} \|x - s\|$

**Definition 3.** Suppose  $\dot{x} = f(x, t)$  is a dynamical system. A set  $S \subset \mathbb{R}^n$  is a positive invariant set if  $x(0) \in S$  implies that  $x(t) \in S$ , for all  $t \geq 0$ .

**Theorem 1.** assume that  $S \in \mathbb{R}^n$  be a closed and convex set. Consider the system  $\dot{x} = f(x, t)$ , where  $f$  is a continuous mapping, has a globally unique solution for every initial point  $x(0) \in S$ . Then  $S$  is an invariant set for this system if and only if

$$f(x, t) \in \mathcal{T}_S(x), \quad \forall x \in \partial S$$

where  $\mathcal{T}_S(x)$  is the tangent cone of  $S$  at  $x$ .

---

\*Corresponding author, Email Address: mala@modares.ac.ir

**Lemma 1.** *Let a polyhedron  $P$  that given in (1), and  $\mathcal{I}_x \neq \emptyset$  for all  $x \in P$ . Then  $P$  is an invariant set for the continuous system  $\dot{x} = f(x, t)$  if and only if for every  $x \in \partial P$  we have*

$$A_i^T f(x, t) \leq 0, \quad \forall i \in \mathcal{I}_x$$

where  $\mathcal{I}_x$  denote the set of indices of the constraints in (1) which are active at  $x$ .

**Corollary 1.**  $\mathbb{R}_{+,0}^{10}$  is an invariant set for the dynamical system given by  $\dot{x} = f(x, t)$  if and only if for any point  $x \in \partial S$ , we have

$$f_i(x, t) \geq 0, \quad \forall i \in \mathcal{I}_x$$

*Proof.* The proof is a direct consequence of Theorem 1 with  $A = -I_n$  and  $b = 0$ .  $\square$

## Supplementary Note 1: Optimal control analysis of an SIR epidemic model

Recall that the basic SIR model is given by the following system of ordinary differential equations:

$$\begin{aligned} \frac{dS}{dt} &= b - \beta S(t)I(t) - dS(t) - u_1(t)S(t), \\ \frac{dI}{dt} &= \beta S(t)I(t) - u_2(t)I(t) - dI(t) - \alpha I(t), \\ \frac{dR}{dt} &= u_1(t)S(t) + u_2(t)I(t) - dR(t). \end{aligned} \tag{2}$$

In this model,  $S(t)$  denotes the number of susceptible individuals at time  $t$ ,  $I(t)$  denotes the number of infectious individuals, and  $R(t)$  denotes the number of recovered (or removed) individuals. The parameter  $b$  represents the recruitment rate into the population,  $\beta$  denotes the disease transmission rate, and  $d$  is the natural death rate. Furthermore,  $u_1$  denotes the proportion of susceptible individuals that is vaccinated per unit time,  $u_2$  denotes the proportion of infectious individuals that is treated per unit time, and  $\alpha$  represents the disease-induced death rate.

**Theorem 2.** *Let  $\mathbb{R}_{+,0}^3 = \{(x_1, x_2, x_3) \in \mathbb{R}^3 | x_i \geq 0, i = 1, 2, 3\}$  represent non-negative quadrant of  $\mathbb{R}^3$ . then  $\mathbb{R}_{+,0}^3$  is an invariant set with respect to the dynamical system (2).*

*Proof.* Let  $E_i = \{(x_1, x_2, x_3) \in \mathbb{R}^3 | x_i = 0, x_j \geq 0, j = 1, 2, 3, j \neq i\}, i = 1, 2, 3$ , then the boundary of  $\mathbb{R}_{+,0}^3$  can be written as

$$\partial \mathbb{R}_{+,0}^3 = \bigcup_{i=1}^3 E_i$$

Suppose  $x = (S, I, R) \in \partial\mathbb{R}_{+,0}^3$ , then for dynamical system (2) we have

$$\begin{aligned} \text{if } x \in E_1, \quad & \frac{dS}{dt} = b \geq 0 \\ \text{if } x \in E_2, \quad & \frac{dI}{dt} = 0 \geq 0 \\ \text{if } x \in E_3, \quad & \frac{dR}{dt} = u_1(t)S(t) + u_2(t)I(t) \geq 0, \end{aligned}$$

By using Corollary 1, the result follows immediately.  $\square$

**Theorem 3.** *The solutions of dynamical system (2) with the initial conditions satisfying the following inequalities*

$$S(0) \geq 0, \quad I(0) \geq 0, \quad R(0) \geq 0,$$

*are bounded.*

*Proof.* The total population  $N(t) = S(t) + I(t) + R(t)$ , it implies that

$$\frac{dN}{dt} = b - N(t)d - \alpha I(t) \leq b - N(t)d$$

Then  $\limsup_{t \rightarrow \infty} \leq \frac{b}{d}$ . Therefore all solutions are bounded  $\square$

The SIR optimal control problem is governed by

$$\begin{aligned} \min_u \quad & I(T) + \frac{1}{2} \int_0^T C_1 u_1(t)^2 + C_2 u_2(t)^2 dt \\ \text{Subject to} \quad & \begin{cases} \dot{S}(t) = b - \beta S(t)I(t) - dS(t) - u_1(t)S(t), \\ \dot{I}(t) = \beta S(t)I(t) - u_2(t)I(t) - dI(t) - \alpha I(t), \\ \dot{R}(t) = u_1(t)S(t) + u_2(t)I(t) - dR(t). \end{cases} \end{aligned} \quad (3)$$

where  $C_1$  and  $C_2$  are the weights for the control effort.  $T$  is the final time of the intervention period. The idea is to define the Hamiltonian  $H$  associated with the problem:

$$\begin{aligned} H = & C_1 u_1(t)^2 + C_2 u_2(t)^2 + \lambda_S(t) [b - \beta S(t)I(t) - dS(t) - u_1(t)S(t)] \\ & + \lambda_I(t) [\beta S(t)I(t) - u_2(t)I(t) - dI(t) - \alpha I(t)] + \lambda_R(t) [u_1(t)S(t) + u_2(t)I(t) - dR(t)], \end{aligned}$$

where  $\lambda_S(t)$ ,  $\lambda_I(t)$  and  $\lambda_R(t)$  are the adjoint variables. Addition the adjoint variables satisfy

$$\begin{aligned} \dot{\lambda}_S(t) &= \lambda_S(t)\beta I(t) + \lambda_S(t)d + \lambda_S(t)u_1 - \lambda_I(t)\beta I(t) \\ \dot{\lambda}_I(t) &= \lambda_S(t)\beta S(t) - \lambda_I(t)\beta S(t) + \lambda_I(t)u_2 + \lambda_I(t)d + \lambda_I(t)\alpha \\ \dot{\lambda}_R(t) &= d\lambda_R(t) \end{aligned}$$

## Supplementary Note 2: Optimal Control of the Kuramoto Model

The characterization of the optimal control follows from Pontryagin's Maximum Principle

$$H(t, x, \lambda, u) = \frac{1}{3^2} \left( \left( \sum_{j=1}^3 \sin(\theta_j) \right)^2 + \left( \sum_{j=1}^3 \cos(\theta_j) \right)^2 \right) - \sum_{i \neq j} B_{ij} u_{ij} + \sum_{i=1}^3 \lambda_i \left( \omega_i + \frac{1}{3} \sum_{j \neq i} u_{ij} \sin(\theta_j - \theta_i) \right)$$

The adjoint variables for  $i = 1, 2$  &  $3$  satisfy

$$\dot{\lambda}_i(t) = \frac{1}{3} \sum_{j \neq i} (\lambda_i u_{ij} - \lambda_j u_{ji}) \cos(\theta_j - \theta_i) - \frac{2}{3^2} \sum_{j \neq i} \sin(\theta_j - \theta_i)$$

where  $\lambda_i(T) = 0$  for  $i = 1, 2$  &  $3$ .

## Supplementary Note 3: proof

**Lemma 2.** *Let  $f : S \subset \mathbb{R}^n \rightarrow \mathbb{R}_+$  is a convex and differentiable function and  $S$  is closed. Consider the unconstrained scalar-valued minimization problem*

$$v^* = \operatorname{argmin}_{v \in \mathbb{R}^n} \max(k_1 \|v\|, k_2 F(x + v))$$

then, there are  $k_1, k_2 > 0$  such that

$$\forall m > 0, \quad \|f(x + v^*) - f(x)\| \leq m$$

*Proof.* Consider the unconstrained scalar-valued minimization problem

$$v(x) = \operatorname{argmin}_{v \in \mathbb{R}^n} \max(k_1 \|v\|, k_2 F(x + v))$$

there is  $v \neq 0$  such that  $f(x + v) < f(x)$ . In addition for  $\exists k_1, k_2 > 0$  such that  $v^* = \operatorname{argmin}_{v \in \mathbb{R}^n} \max(k_1 \|v\|, k_2 F(x + v))$  and

$$k_1 \|v^*\| = k_2 f(x + v^*) = \max(k_1 \|v^*\|, k_2 F(x + v^*))$$

$f$  is Lipschitz continuous, then

$$\|f(x + v^*) - f(x)\| < L \|v^*\| < L \frac{k_2}{k_1} f(x + v^*)$$

$S$  is closed then

$$\exists M \quad s.t. \quad f(x + v^*) \leq M$$

then we have

$$\|f(x + v^*) - f(x)\| < L \|v^*\| \leq L \frac{k_2}{k_1} f(x + v^*) \leq \frac{k_2}{k_1} M$$

its sufficient that  $k_1 > \frac{M}{m} k_2$

□

**Corollary 2.** *Let  $f = \|\frac{\partial H}{\partial u}\|$ . Note that Lemma (2),  $\frac{\partial H}{\partial u}$  is valid for neighborhood  $B_m(u)$  and by considering lipschitz continuity of neural networks, the iterative updates of the neural networks based on algorithm 1 converge to the optimal solution.*

## References

1. Nagumo, M. (1942). Über die lage der integralkurven gewöhnlicher differentialgleichungen. Proceedings of the Physico-Mathematical Society of Japan. 3rd Series, 24, 551-559.
2. Horváth, Z., Song, Y., & Terlaky, T. (2017). A novel unified approach to invariance conditions for a linear dynamical system. Applied Mathematics and Computation, 298, 351-367.
